# Supplementary material
Source: publisher figshare collection journal article supplement (https://karger.figshare.com/ndownloader/files/27670785)
Supplement: Supplementary file 1 [file 27670785]

**Supplementary Table 1.** Quality assessment of non-controlled studies

| **Author** | Bruci 2020 [25] | Colica 2017 [26] | de Luis 2016 [27] | Gomez-Arbelaez 2017 [29] | Valenzano 2019 [36] | Gutiérrez-Repiso 2019 [30] | Leonetti 2014 [31] |
| --- | --- | --- | --- | --- | --- | --- | --- |
| Case series collected in more than one center, i.e., multi-center study | 0 | 0 | 0 | 0 | 0 | 0 | 1 |
| Is the hypothesis/aim/objective of the study clearly described? | 1 | 1 | 1 | 1 | 1 | 1 | 1 |
| Are the inclusion and exclusion criteria (case definition) clearly reported? | 0 | 1 | 1 | 1 | 0 | 1 | 1 |
| Is there a clear definition of the outcomes reported? | 1 | 1 | 1 | 1 | 1 | 1 | 1 |
| Were data collected prospectively? | 1 | 1 | 1 | 1 | 1 | 1 | 1 |
| Is there an explicit statement that patients were recruited consecutively? | 1 | 1 | 1 | 0 | 0 | 1 | 0 |
| Are the main findings of the study clearly described? | 1 | 1 | 1 | 1 | 1 | 1 | 1 |
| Are outcomes stratified? (e.g., by disease stage, abnormal test results, patient characteristics) | 1 | 1 | 1 | 1 | 1 | 1 | 1 |
| **Total Score** | **6** | **7** | **7** | **6** | **5** | **7** | **7** |

NICE guidelines checklist: Yes = 1, No (not reported, not available) = 0; Total score, 8; ≤3, poor quality; 4–6, fair quality; ≥7, good quality
